# Supplementary material for: Assessment of a developed pig cadaver model for teaching crown lengthening surgical procedures
Source: PeerJ. 2022 Jun 1;10:e13421. doi: 10.7717/peerj.13421 (PMC9166679; doi:10.7717/peerj.13421)
Supplement: Supplemental Information 1 [file peerj-10-13421-s001.xlsx]

## Sheet: Student questionnaires
Student	pre1	pre2	pre3	pre4	pre5	pre6	pre7	sum1	aft1	aft2	aft3	aft4	aft5	aft6	aft7	sum2	aft8
1	6	8	6	5	10	4	1	40	8	10	8	7	10	8	9	60	9
2	9	10	8	4	5	2	0	38	10	10	9	9	10	8	8	64	9
3	8	2	1	3	10	7	4	35	8	9	8	8	10	8	7	58	9
4	6	6	6	5	10	7	2	42	8	8	8	8	10	7	7	54	9
5	7	10	8	5	10	8	5	53	6	10	10	7	10	6	7	56	9
6	6	6	5	3	10	2	0	32	8	9	8	9	10	7	7	58	8.9
7	6	4	5	5	10	9	1	40	10	10	10	8	10	9	9	66	9
8	7	5	7	2	10	5	4	40	8	9	8	8	10	8	7	57	9
9	5	6	6	2	10	6	5	40	8	8	8	5	10	9	9	57	9
10	6	0	4	2	10	5	2	29	8	7	6	9	10	7	8	55	9
