# Supplementary material for: Assessment of a developed pig cadaver model for teaching crown lengthening surgical procedures
Source: PeerJ. 2022 Jun 1;10:e13421. doi: 10.7717/peerj.13421 (PMC9166679; doi:10.7717/peerj.13421)
Supplement: Supplemental Information 2 [file peerj-10-13421-s002.xlsx]

## Sheet: Teacher questionnaires
code	q1	q2	q3	q4	q5
1	7	7	9	8	8
2	9	6	9	7	8
3	8.3	8.2	9.4	7.2	8.3
4	7	10	10	10	10
5	7	5.1	9.1	8.4	7.9
6	6.4	5.9	8.5	7.9	7.6
7	7.6	6.9	10	6.5	9
8	8	8	10	10	9
9	8.8	4.9	8.8	2.6	4.6
10	9.4	7.5	6.6	6.6	9.5
11	8	8	9	8	9
12	9	8	10	10	10
13	8	7	7	9	10
14	7	7	9	9	9
15	9	9	10	10	9
16	9	9	8	10	10
17	8	7	9	7	9
18	10	9	9	10	10
